# Supplementary material for: Non-Alcoholic Steatohepatitis Decreases Microsomal Liver Function in the Absence of Fibrosis
Source: PubMed Central journal article supplement (PMC7760673; doi:10.3390/biomedicines8120546), 2020-11-27
Supplement: biomedicines-08-00546-s001.pdf [file biomedicines-08-00546-s001.pdf]

## Supplementary materials

**Table 1. S:** P values for patient characteristics for NAFLD-F.

| Value                     | P (NAFLD-F vs. noNAFLD) | P (NAFLD-F vs. NAFL) | P (NAFLD-F vs. NASH-noF) |
|---------------------------|-------------------------|----------------------|--------------------------|
| Age (yrs)                 | <0.0001*                | 0.022*               | 0.007*                   |
| Gender (female)           | <0.00001*               | 0.012*               | 0.021*                   |
| Smoking (non-smoker)      | 0.886                   | 0.525                | 0.131                    |
| BMI (kg/m <sup>2</sup> )  | 0.170                   | 0.604                | 0.690                    |
| Waist (cm)                | <0.00001*               | 0.002*               | <0.0001*                 |
| AST (U/L)                 | <0.00001*               | <0.00001*            | <0.00001*                |
| ALT (U/L)                 | <0.00001*               | <0.0001*             | 0.012*                   |
| GGT (U/L)                 | <0.00001*               | <0.00001*            | <0.00001*                |
| PLT (10E <sup>9</sup> /L) | <0.0001*                | 0.002*               | <0.00001*                |
| Tot chol (mg/dL)          | 0.027*                  | 0.011*               | 0.001*                   |
| HDL (mg/dL)               | <0.00001*               | 0.013*               | 0.001*                   |
| TG (mg/dL)                | 0.007*                  | 0.502                | 0.903                    |
| LDL (mg/dL)               | 0.156                   | 0.052                | 0.016*                   |
| Tot bili (mg/dL)          | <0.001*                 | 0.018*               | 0.007*                   |
| HbA1c (%)                 | <0.00001*               | <0.0001*             | <0.00001*                |
| Alb (g/dL)                | 0.049*                  | 0.015*               | 0.001*                   |
| INR                       | <0.0001*                | 0.001*               | <0.0001*                 |
| Steatosis                 | <0.00001*               | <0.00001*            | <0.0001*                 |
| Inflammation              | <0.00001*               | <0.00001*            | <0.00001*                |
| Ballooning                | <0.00001*               | <0.00001*            | <0.00001*                |
| NAS                       | <0.00001*               | <0.00001*            | <0.0001*                 |
| USS                       | <0.00001*               | 0.018*               | 0.277                    |
| ABTpeak                   | <0.00001*               | <0.00001*            | <0.0001*                 |
| ABTcum                    | <0.00001*               | <0.00001*            | <0.001*                  |

P values for the characteristics of patients with non-alcoholic fatty liver disease and significant fibrosis (NAFLD-F) versus patients without NAFLD (noNAFLD), patients with non-alcoholic fatty liver (NAFL) and patients with non-alcoholic steatohepatitis without significant fibrosis (NASH-noF). P-value is calculated between different groups with \* indicating statistical significance (<0.05). BMI, body mass index; AST, aspartate aminotransferase; ALT, alanine aminotransferase; GGT, gamma glutamyl transpeptidase; PLT, platelets; tot chol, total cholesterol; HDL, high density lipoprotein cholesterol; TG, triglycerides; LDL, low density lipoprotein cholesterol; tot bili, total bilirubin; HbA1c, haemoglobin A1c; Alb, albumin; INR, international normalized ratio; NAS, NAFLD activity score; USS, ultrasound steatosis score; ABTpeak, aminopyrine breath test peak value; ABTcum, aminopyrine breath test cumulative value.
